# Supplementary material for: Admission to the surgical intensive care unit during intensivist coverage is associated with lower incidence of postoperative acute kidney injury and shorter ventilator time
Source: Springer Nature journal article supplement (doi:10.1007/s00540-019-02684-8), 2019-09-24
Supplement: MOESM3 [file 17202914]

Table S3. Sensitivity analysis: Postoperative AKI and ventilator time in the cardiac and major vascular surgery cohort in entire cohort (n=1,991)

| Variables | | OR (95% CI) | *P-value** |
| --- | --- | --- | --- |
| **Total AKI** | |  |  |
| Postoperative ICU admission | |  |  |
|  | Intensivist coverage | 1 |  |
|  | Non-intensivist coverage | 1.16 (0.93, 1.46) | 0.192 |
| **AKI stage ≥ 2** | |  |  |
| Postoperative ICU admission | |  |  |
|  | Intensivist coverage | 1 |  |
|  | Non-intensivist coverage | 1.25 (0.85, 1.85) | 0.256 |
| **Postoperative ventilator time**, hour | | Exp. Coef. (95% CI) |  |
| Postoperative ICU admission | |  |  |
|  | Intensivist coverage | 1 |  |
|  | Non-intensivist coverage | 2.08 (1.78, 2.42) | <0.001 |

OR, odds ratio; CI, confidence interval; ICU, intensive care unit; Exp, exponentiated; Coef, coefficient
